# Supplementary material
Source: Elsevier journal article supplement (https://www.sciencedirect.com/science/article/pii/S0120884521000055)

## MÉTODO DE PONSETI

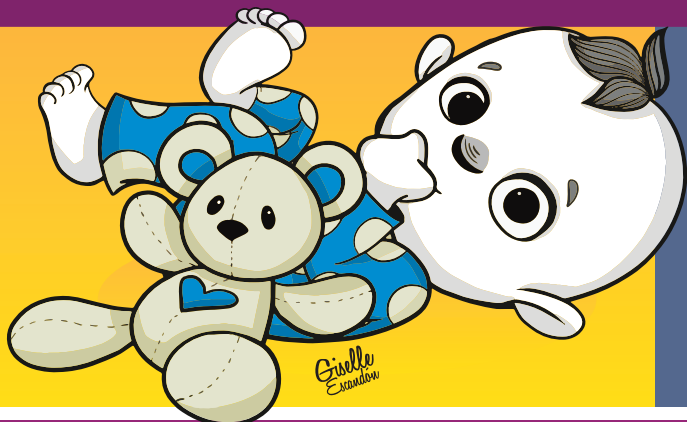

# PARA CORRECCIÓN DEL PIE EQUINOVARO INFORMACIÓN PARA PADRES

### ¿QUÉ ES EL PIE EQUINOVARO?

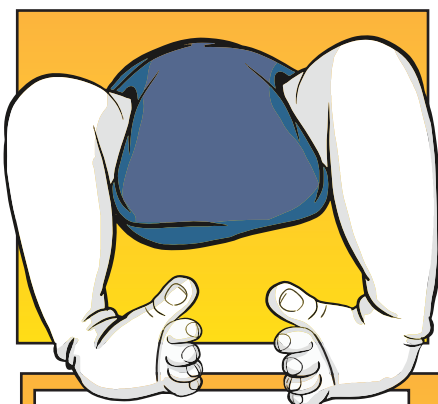

El **pie equino varo (PEV)** es la deformidad congénita más común de los pies. Sucede aproximadamente en 1 de cada 1000 nacidos vivos.

**LA CAUSA DEL PIE EQUINOVARO ES DESCONOCIDA.**

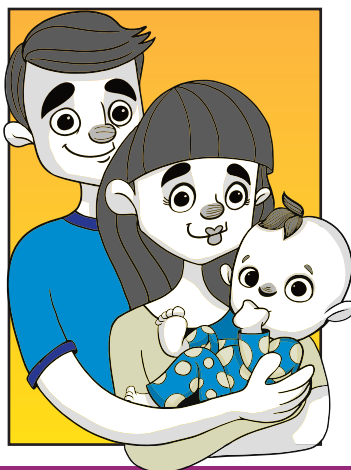

No sucede por algo que los padres hayan hecho o dejado de hacer, y no hay razón para que se sientan culpables por tener un hijo con pie equino varo.

Las **posibilidades** de tener un segundo hijo con la misma enfermedad son de aproximadamente **1 en 30**.

"Los padres de los niños nacidos con PEV pueden estar seguros de que su bebé, tratado por manos expertas, tendrá pies de apariencia y función adecuadas. El PEV bien tratado no genera ninguna discapacidad y es totalmente compatible con la normalidad".

**Ignacio Ponseti, M.D.**

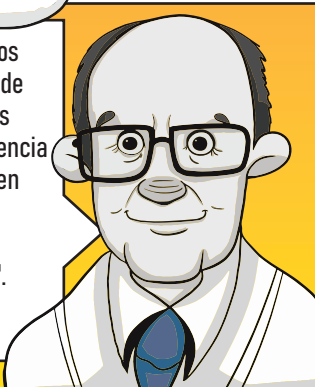

### ¿EXISTE TRATAMIENTO?

**SI.** La mayoría de los PEV se pueden corregir en la infancia en seis a ocho semanas según el caso, mediante manipulaciones suaves y colocación de varios yesos que van corrigiendo la deformidad. Posteriormente en la mayoría de los casos se realiza un pequeño procedimiento llamado tenotomía del tendón de Aquiles y luego el uso de unos zapatitos en la noche.

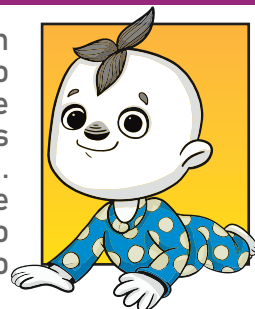

Con el compromiso de los padres y siguiendo las recomendaciones médicas, el tratamiento es efectivo en mas de 95% de los casos

### ¿CUÁNDO INICIAR EL TRATAMIENTO?

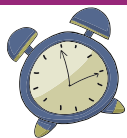

El tratamiento debe iniciarse idealmente en el 1er mes de vida con el fin de aprovechar la elasticidad de los tejidos que forman los ligamentos, tendones y cápsulas articulares. Sin embargo, el método es eficaz en niños mayores, e inclusive en adultos, por lo que se puede iniciar a cualquier edad.

### ¿CÓMO FUNCIONA EL MÉTODO?

Con el método de Ponseti las estructuras se estiran con manipulaciones suaves semanales asociado a colocación de un yeso para mantener así la corrección obtenida.

De este modo, los huesos desplazados son alineados de forma correcta y el pie gradualmente adquiere un aspecto normal.

## PASO 1

Manipulación con posterior colocación de yesos que van desde los dedos de los pies hasta el muslo. Esto se repite cada semana y usualmente 5 a 7 series son suficiente; sin embargo, algunos niños podrían requerir más manipulaciones y yesos o un tratamiento más prolongado.

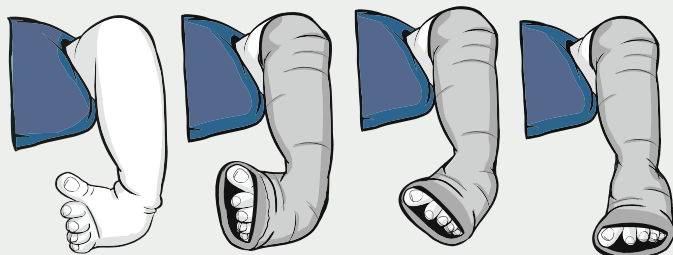

## PASO 2

Luego de las manipulaciones, gran parte de los casos requieren un procedimiento en el tendón de Aquiles por medio de una pequeña incisión (5mm). Se puede realizar con anestesia general o local antes de colocar el último yeso.

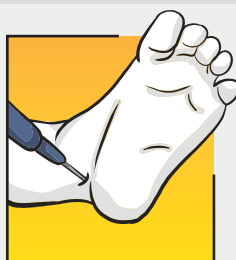

## PASO 3

Queridos padres, esta parte es muy importante para el éxito del tratamiento y que el resultado sea duradero.

Luego de retirar el último yeso se debe utilizar una férula por tiempo completo y posteriormente por la noche hasta los 4-5 años.

Si no se usa la férula juiciosamente la deformidad usualmente reaparece y el tratamiento debe repetirse.

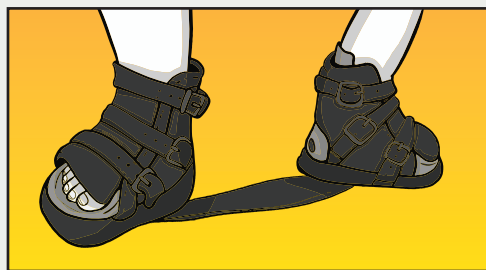

## CUIDADOS DEL YESO EN CASA

**1** Revise la circulación, temperatura y color de los dedos (deben ser rosados) cada hora durante las primeras 6 horas después de la colocación del yeso y posteriormente cuatro (4) veces al día.

Presione los dedos para observar cómo recobran el color rosado. Si los dedos están oscuros o fríos y no pasan de blanco a rosado, el yeso puede estar muy ajustado. Si esto ocurre acuda a su médico o al servicio de urgencias.

**2** Mire la relación entre las puntas de los dedos y el borde del yeso. Si los dedos se están "hundiendo" en el yeso es porque el yeso se ha deslizado.

Esto puede crear zonas de presión en la piel. Busque inmediatamente al ortopedista o a alguien de su equipo de trabajo y cuénteles lo que ha sucedido.

**3** Mantenga el yeso limpio y seco. En caso de ensuciarse se puede limpiar con un paño ligeramente húmedo.

**4** Cuando su bebé esté acostado coloque una pequeña almohada o cojín debajo del yeso. Así se previenen zonas de presión en el talón que pueden causar una úlcera.

**5** Prevenga que el yeso se ensucie cambiando el pañal frecuentemente. Mantenga el yeso por fuera del pañal para prevenir que entre orina o materia fecal.

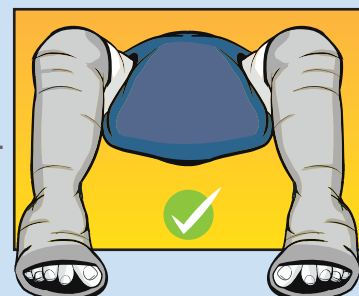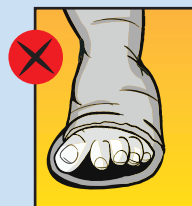

Dedos por fuera del yeso.

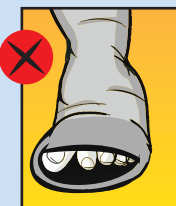

Dedos "Hundidos" en el yeso.

Visite a su doctor o a la clínica en cualquiera de las siguientes situaciones:

- Si nota mal olor o secreción que provenga de adentro del yeso.
- Si la piel en los bordes del yeso se ve roja, con lesiones o irritada.
- Si hay mala circulación en los dedos
- Si el yeso se desacomoda.
- Si el niño se queja de dolor o tiene fiebre de 38,5 grados o más sin una razón que lo explique como gripa o un virus.

Para mayor información visita:

Diseño e Ilustración por:

CON EL APOYO DE:

**WWW.PONSETI.INFO**  
**WWW.SOCOIN.CO.**

**Giselle Escandón Silva**

Ilustradora y Caricaturista

@GisCreativa

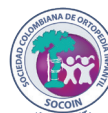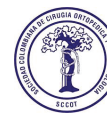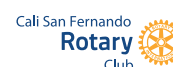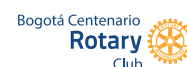

Supplement: mmc3 [file S0120884521000055:mmc3.pdf]
